# Supplementary material for: Microbial and Chemical Characterization of Natural-Style Green Table Olives from the Gordal, Hojiblanca and Manzanilla Cultivars
Source: Foods. 2023 Jun 15;12(12):2386. doi: 10.3390/foods12122386 (PMC10297402; doi:10.3390/foods12122386)
Supplement: Supplementary file 1 [file foods-12-02386-s001.zip › Table S1.xlsx]

## Sheet: Table S1
	Table S1. Distribution of reads in the quality check protocol and DADA2 routine of samples of the fermenting brines of olives subjected to the metataxonomy analysis of 16S rRNA and ITS amplicons.
	A: 16S rRNA amplicons (Bacteria).
	Sample	Reads	Filtered	Denoised F	Denoised R	Merged	no Chimeras
	G1-60*	150739	117330	117185	117256	116966	116724
	G1-120	151169	121884	121764	121796	120503	106176
	G1-180	133543	97723	97452	97667	96281	84537
	G2-60	126540	99202	99030	99074	98766	98050
	G2-120	138341	112708	112593	112639	111715	100834
	G2-180	146646	114541	114394	114445	113025	98340
	H1-60	127418	79086	78299	78511	77022	75992
	H1-120	140525	89813	89123	89251	87985	87674
	H1-180	116063	78612	77835	78023	76850	76522
	H2-60	148404	79790	78855	79003	77006	75605
	H2-120	49113	6738	6560	6490	6228	6090
	H2-180	112555	72138	71366	71569	70378	70058
	M1-60	123301	82006	81451	81490	80697	80580
	M1-120	133834	89281	88463	88469	86569	86447
	M1-180	98295	62330	61831	61802	60628	60507
	M2-60	81862	54760	54399	54469	53921	53695
	M2-120	135530	85586	84310	84413	81783	81632
	M2-180	123334	78742	77606	77863	76126	75930
	B: ITS amplicons (Yeast)
	Sample	Reads	Filtered	Denoised F	Denoised R	Merged	no Chimeras
	G1-60	196341	128009	127894	127969	127814	126368
	G1-120	188256	115081	114947	115013	114639	113046
	G1-180	173490	89105	89020	89047	88908	88610
	G2-60	120019	67688	67646	67655	67567	66912
	G2-120	155421	62728	62622	62656	62306	62122
	G2-180	181970	81367	81286	81320	81134	81027
	H1-60	196684	126599	126544	126537	126477	125781
	H1-120	217321	124231	124172	124174	124131	123651
	H1-180	197429	108285	108163	108227	108067	107115
	H2-60	192377	123788	123649	123685	123555	122906
	H2-120	194472	123042	122910	122925	122803	121206
	H2-180	172524	102761	102668	102691	102625	100649
	M1-60	165498	106182	106138	106134	106112	104579
	M1-120	174094	86950	86857	86906	86804	86334
	M1-180	247803	131304	131175	131239	131013	128886
	M2-60	186609	121348	121246	121180	121112	121108
	M2-120	159806	91063	90968	91015	90918	89527
	M2-180	229529	145002	144650	144924	144589	143885
	*The number behing the sample code indicates the sampling time (days). Replicate (1, 2) is indicated behing the olive cultivar code: G, Gordal; H, Hojiblanca; M, Manzanilla.
