# Supplementary material for: Microbial and Chemical Characterization of Natural-Style Green Table Olives from the Gordal, Hojiblanca and Manzanilla Cultivars
Source: Foods. 2023 Jun 15;12(12):2386. doi: 10.3390/foods12122386 (PMC10297402; doi:10.3390/foods12122386)
Supplement: Supplementary file 1 [file foods-12-02386-s001.zip › Table S2.xlsx]

## Sheet: Hoja1
	Table S2. Number of reads, OTUs, Good’s coverage and different alpha diversity estimators of the metatax-onomy analysis of 16S rRNA (Bacteria and Archaea) and ITS (Fungi) amplicons of the fermenting brines from the Gordal, Hojiblanca and Manzanilla cultivars processed in the natural style.
	Bacteria				Diversity estimator
	Sample	No. Reads*	No. OTUs	Good's Coverage	Shannon (H)	Simpson (1-D)	Simpson Reciprocal (1/D)	Shannon Equitability Index (EH)
	G1-60	116724	21	1	0.11	0.03	1.03	0.0361305
	G1-120	106176	11	1	0.54	0.35	1.53	0.225197
	G1-180	84537	11	1	0.39	0.22	1.28	0.162643
	G2-60	98050	21	1	0.12	0.03	1.03	0.039415
	G2-120	100834	12	1	0.47	0.29	1.4	0.189142
	G2-180	98340	13	1	0.5	0.3	1.43	0.194936
	H1-60	75992	133	1	3.02	0.89	9.21	0.617543
	H1-120	87674	118	0.99	2.82	0.9	9.85	0.59111
	H1-180	76522	104	1	2.77	0.9	9.53	0.596418
	H2-60	75605	138	1	2.98	0.88	8.22	0.604799
	H2-120	6090	45	1	2.52	0.84	6.09	0.661997
	H2-180	70058	102	1	2.7	0.89	8.81	0.583787
	M1-60	80580	75	1	2.51	0.85	6.68	0.581357
	M1-120	86447	94	1	2.6	0.86	7.19	0.572272
	M1-180	60507	69	1	2.47	0.86	7.25	0.583358
	M2-60	53695	62	1	1.8	0.69	3.27	0.436138
	M2-120	81632	123	1	2.46	0.82	5.65	0.511202
	M2-180	75930	113	1	2.72	0.89	9.31	0.575371
	Total	1435393
	Average:	79744.1	70.2778
	SD:	23511.7	45.5836
	Fungi				Diversity estimator
	Sample	No. Reads*	No. OTUs	Good's Coverage	Shannon (H)	Simpson (1-D)	Simpson Reciprocal (1/D)	Shannon Equitability Index (EH)
	G1-60	126368	6	1	0.49	0.26	1.35	0.273474
	G1-120	113046	9	1	0.6	0.31	1.45	0.273072
	G1-180	88610	14	1	0.67	0.34	1.52	0.253879
	G2-60	66912	6	1	0.37	0.2	1.25	0.206501
	G2-120	62122	10	1	0.5	0.21	1.26	0.217147
	G2-180	81027	9	1	0.44	0.18	1.22	0.200253
	H1-60	125781	24	1	0.71	0.46	1.84	0.223407
	H1-120	123651	21	1	0.97	0.56	2.27	0.318605
	H1-180	107115	16	1	1.36	0.68	3.15	0.490516
	H2-60	122906	23	1	0.88	0.52	2.06	0.280658
	H2-120	121206	28	1	0.97	0.53	2.14	0.291099
	H2-180	100649	18	1	1.17	0.61	2.59	0.404792
	M1-60	104579	14	1	0.52	0.29	1.42	0.19704
	M1-120	86334	9	1	0.59	0.3	1.42	0.268521
	M1-180	128886	16	1	1.18	0.61	2.58	0.425595
	M2-60	121108	21	1	0.1	0.03	1.03	0.0328459
	M2-120	89527	12	1	0.84	0.43	1.76	0.338041
	M2-180	143885	11	1	0.29	0.1	1.12	0.120939
	Total	1913712
	Average:	106317	14.8333
	SD:	22284.9	6.31796
	Sample olive variety key: G, Gordal; H, Hojiblanca; M, Manzanilla.
	Sample time key: sampling day after brining is indicated behind the variety key
	*It refers to clean, quality reads.
	SD, standard deviation (n=18)
